# Supplementary material for: Traumatic Distress of COVID-19 and Depression in the General Population: Exploring the Role of Resilience, Anxiety, and Hope
Source: MDPI journal article supplement (doi:10.3390/ijerph18168485), 2021-08-11
Supplement: s1 [file s1]

**Table S1.** Mean scores, standard deviations and one way analysis of variance results accounted for by gender and country of residence.

| Gender               | Traumatic distress<br>(M, SD)                | Anxiety<br>(M, SD)                           | Depression<br>(M, SD)                        | Resilience<br>(M, SD)                        | Hope<br>(M, SD)                              |
|----------------------|----------------------------------------------|----------------------------------------------|----------------------------------------------|----------------------------------------------|----------------------------------------------|
| Female               | 16.1 (14.8)                                  | 5.57 (7.04)                                  | 8.99 (9.10)                                  | 71.8 (10.0)                                  | 50.6 (9.02)                                  |
| Male                 | 12.7 (14.1)                                  | 3.67 (5.02)                                  | 7.20 (7.80)                                  | 70.1 (10.0)                                  | 52.1 (7.69)                                  |
| ANOVA ( $n=455$ )    | $F(1, 454) = 6.06, p = 0.014, \eta^2 = 0.01$ | $F(1, 454) = 9.50, p = 0.002, \eta^2 = 0.02$ | $F(1, 454) = 4.53, p = 0.03, \eta^2 = 0.009$ | $F(1, 455) = 0.76, p = 0.38, \eta^2 = 0.001$ | $F(1, 455) = 3.15, p = 0.08, \eta^2 = 0.006$ |
| Country of residence |                                              |                                              |                                              |                                              |                                              |
| Ireland              | 18.7 (16.2)                                  | 6.24 (7.3)                                   | 11.1 (9.59)                                  | 69.2 (10.6)                                  | 48.4 (9.12)                                  |
| U.S.                 | 11.9 (12.4)                                  | 3.85 (5.45)                                  | 6.19 (7.29)                                  | 73.1 (9.27)                                  | 53.1 (7.62)                                  |
| ANOVA ( $n = 456$ )  | $F(1, 455) = 26.3, p < 0.001, \eta^2 = 0.05$ | $F(1, 455) = 15.9, p < 0.001, \eta^2 = 0.03$ | $F(1, 455) = 39.1, p < 0.001, \eta^2 = 0.07$ | $F(1, 455) = 17.0, p < 0.001, \eta^2 = 0.03$ | $F(1, 455) = 35.4, p < 0.001, \eta^2 = 0.07$ |

M, mean scores; SD, standard deviation; U.S., United States
